# Supplementary material for: Degradation and Pathways of Carvone in Soil and Water
Source: MDPI journal article supplement (doi:10.3390/molecules27082415), 2022-04-08
Supplement: s1 [file s1]

---

# Degradation and Pathways of Carvone in Soil and Water

Chenyu Huang <sup>1</sup>, Wenwen Zhou <sup>2</sup>, Chuanfei Bian <sup>1</sup>, Long Wang <sup>1</sup>, Yuqi Li <sup>3</sup> and Baotong Li <sup>1,\*</sup>

<sup>1</sup> College of Land Resources and Environment, Jiangxi Agricultural University, 330045, Nanchang, China; ChenyuHuang999@163.com (C.H.); bcf940331@163.com (C.B.); WL2283807483@163.com (L.W.)

<sup>2</sup> College of Food Sciences, Jiangxi Agricultural University, Nanchang 330045, China; fly\_zww@163.com

<sup>3</sup> College of Engineering, Jiangxi Agricultural University, Nanchang 330045, China; tonglm66@163.com

\* Correspondence: libt666@163.com; Tel: +86-15179409965

**Table S1.** Linear equations,  $R^2$ , matrix effects and limits of quantification of carvone and its degradations in n-hexane, soil and aqueous solutions.

| Compound       | Matrix   | Regression equation | $R^2$  | Matrix effect | LOQ ( $\mu\text{g kg}^{-1}$ ) |
|----------------|----------|---------------------|--------|---------------|-------------------------------|
| (-)-Carvone    | N-hexane | $y=20103.3x+59.0$   | 0.9998 | -             | 10                            |
|                | S1       | $y=17690.6x+61.7$   | 0.9994 | -0.12         | 10                            |
|                | S2       | $y=22185.4x+41.4$   | 0.9994 | 0.10          | 10                            |
|                | S3       | $y=19700.9x+48.5$   | 0.9997 | -0.05         | 10                            |
|                | S4       | $y=19098.1x+65.5$   | 0.9996 | -0.05         | 10                            |
|                | PH=4     | $y=19902.3x+55.3$   | 0.9998 | -0.01         | 10                            |
|                | PH=7     | $y=20304.3x+66.9$   | 0.9998 | 0.01          | 10                            |
|                | PH=9     | $y=20505.4x+53.8$   | 0.9998 | 0.02          | 10                            |
| Carvonecamphor | N-hexane | $y=62691.2x+788.0$  | 0.9998 | -             | 30                            |
|                | PH=7     | $y=62565.8x+754.3$  | 0.9998 | -0.02         | 30                            |
| Dihydrocarveol | N-hexane | $y=10486.3x-21.9$   | 0.9998 | -             | 10                            |
|                | S2       | $y=10099.7x-91.8$   | 0.9978 | -0.04         | 10                            |
| Dihydrocarvone | N-hexane | $y=2170.6x+9.6$     | 0.9999 | -             | 50                            |
|                | S2       | $y=2104.1x+38.9$    | 0.9978 | -0.03         | 50                            |

**Table S2.** Average recoveries and RSDs (n=5, %) for target compounds from different matrices at three spiked levels.

| Matrix | Spiked level<br>( $\mu\text{g kg}^{-1}$ ) | (-)-carvone  |         | Dihydrocarveol |         | Dihydrocarvone |         | Carvone camphor |         |
|--------|-------------------------------------------|--------------|---------|----------------|---------|----------------|---------|-----------------|---------|
|        |                                           | Recovery (%) | RSD (%) | Recovery (%)   | RSD (%) | Recovery (%)   | RSD (%) | Recovery (%)    | RSD (%) |
| S1     | 50                                        | 91.2         | 2.5     | 82.0           | 5.8     | 93.3           | 8.4     |                 |         |
|        | 500                                       | 92.1         | 3.7     | 77.7           | 6.4     | 84.3           | 4.7     |                 |         |
|        | 5000                                      | 99.2         | 9.6     | 80.5           | 4.8     | 88.8           | 5.6     |                 |         |
| S2     | 50                                        | 86.1         | 4.3     | 82.7           | 5.1     | 85.6           | 9.7     |                 |         |
|        | 500                                       | 80.5         | 5.4     | 80.4           | 6.4     | 87.6           | 5.8     |                 |         |
|        | 5000                                      | 85.4         | 7.6     | 79.5           | 5.4     | 84.3           | 4.3     |                 |         |
| S3     | 50                                        | 78.5         | 2.9     | 71.9           | 11.3    | 82.5           | 5.4     |                 |         |
|        | 500                                       | 85.4         | 6.2     | 88.4           | 5.7     | 93.4           | 3.3     |                 |         |
|        | 5000                                      | 75.8         | 3.7     | 83.0           | 5.9     | 95.4           | 2.8     |                 |         |
| S4     | 50                                        | 90.09        | 3.1     | 89.1           | 2.3     | 89.4           | 2.1     |                 |         |
|        | 500                                       | 99.89        | 1.5     | 77.4           | 1.1     | 92.5           | 1.9     |                 |         |
|        | 5000                                      | 96.33        | 4.7     | 81.8           | 5.5     | 84.3           | 2.8     |                 |         |
| pH=4   | 50                                        | 99.12        | 2.2     |                |         |                |         | 93.51           | 3.7     |
|        | 500                                       | 98.5         | 1.8     |                |         |                |         | 90.41           | 4.3     |
|        | 5000                                      | 97.81        | 2.4     |                |         |                |         | 96.57           | 2.8     |
| pH =7  | 50                                        | 91.55        | 6.9     |                |         |                |         | 98.83           | 1.8     |
|        | 500                                       | 94.97        | 1.5     |                |         |                |         | 99.92           | 2.4     |
|        | 5000                                      | 94.82        | 1.7     |                |         |                |         | 91.76           | 2.8     |
| pH =9  | 50                                        | 95.84        | 2.2     |                |         |                |         | 90.95           | 2.3     |
|        | 500                                       | 95.59        | 1.4     |                |         |                |         | 97.43           | 2.2     |
|        | 5000                                      | 98.7         | 1.8     |                |         |                |         | 96.95           | 4.5     |
